# Supplementary material for: The Repeating, Modular Architecture of the HtrA Proteases
Source: MDPI journal article supplement (doi:10.3390/biom12060793), 2022-06-07
Supplement: s1 [file s1]

# Supplimental Material for: “The Repeating, Modular Architecture of the HtrA Proteases”

**Authors:** Matthew Merski<sup>1\*</sup>, Sandra Macedo-Ribeiro<sup>2</sup>, Rafal Wieczorek<sup>3</sup>, Maria W. Górna<sup>1</sup>

## **Affilitations:**

1 - Structural Biology Group, Biological and Chemical Research Centre, Faculty of Chemistry, University of Warsaw, Żwirki i Wigury 101, 02-089 Warsaw, Poland

2 - Instituto de Investigação e Inovação em Saúde and Instituto de Biologia Molecular e Celular (IBMC), Universidade do Porto, Porto, Portugal

3 - Faculty of Chemistry, University of Warsaw, Pasteura 1, 02-093 Warsaw, Poland

\* - corresponding author, email: [merski@gmail.com](mailto:merski@gmail.com) (+48 225 526 642) (M.M.);

[mgorna@chem.uw.edu.pl](mailto:mgorna@chem.uw.edu.pl) (M.W.G.)

### Figure S1: MUSCLE 3.8 Alignment of HtrA Proteases

Multiple sequence alignment of unique HtrA sequences from the PDB. The  $\beta$ -barrel structures are identified with light grey highlighting (Figure S4). Potential sequence repeat regions are identified by dark grey highlighting while residues matching the canonical repeat sequence are shown with green highlighting. Structure 4a9g lacked explicit identification of its secondary structures within the PDB model and PDB ID 3nzi lacked a modeled PDZ-like domain so those  $\beta$ -barrel modules were not indicated with grey highlighting.

```
4fln -----NAESSNPQKMAFKAFG-----
5ilb -----GHDA SF-----
5jyk -----MGSSHH-----HHHHSSGLVPRGSHMASMTGGQQMGRGSEFELLNNE
5fht -----MAVP-----
3nzi -----MG-----
4ri0 -----
6z05 -----
2z9i -----ANMPP-----
5zvj -----MVDAFTTSKVT-----
3gdv -----MRGSSH-----HHHHGRSLNPLS-----
7co3 MPKALRFLGW PVLVGVLLALLI IQHNPELVGLPRQEVHVEQ-----
3pv5 -----MRGSSH-----HHHHGSAEPPN-----
4ynn -----MRGSSH-----HHHHGSAQDLT-----
4a9g -----SIPGQVADQAP-----
2zle -----
6jjo -----MGSSHH-----HHHHSSGLVPRGSHMA-----
5t69 -----GIDPFTMADDLPAPVI-----
4ic5 -----MGSSHH-----HHHHSSGLVPRGSHMASAL-----
4ic6 -----MGLGDP-----SVATVEDVSPT-----
3qo6 -----MAAFVVSTPK-----
```

```
4fln -----SPKKEKESLSDFS RDQQT DPAKIHDA SF LNAVVKVYC-----
5ilb -----LNAVVKVYC-----
5jyk SEAGNQRTSSPERSRSLHSDTKNGDCSNGMIVSTTTESIPAPSWETVVKVPSMDAV
5fht -----SPPPASPRSQYNFIADVVEKT-----APAVVYIEI-----
3nzi -----QEDPNSLRHKYNFIADVVEKI-----APAVVHIEL-----
4ri0 -----LHQLSSPRYKFNFIADVVEKI-----APAVVHIEL-----
6z05 -----VLSYHDS-----IKDA-----KKS VVNISTSKTITRANRPS
2z9i -----GSVEQVAAKV-----VPSVVMLET-----
5zvj -----LSTTGNAQEPAGRF TKVAAAV-----ADSVVTIES-----
3gdv -----TPQFDSTDETPASYNLAVRRA-----APAVNVYN-----
7co3 -----APLLSRLQEGPVSYANAVSRA-----APAVANLYTTKMVSKPSHPL
3pv5 -----MPSMAPV-----LKNI-----MPAIVNVAVQGYLP-----
4ynn -----NMPSLAPVLKNA-----MPAIVNVAVQGYLPNNM-----
4a9g -----LPSLAPM-----LEKV-----LPAVVSVRVEGTASQGQK-----
2zle -----AETSSATTAQQMPSLAPMLEKV-----MPSVVSINVEGSTTVNTPR-----
6jjo -----ETSSATTAQQMPSLAPMLEKV-----MPSVVSINVEGSTTVNTPR-----
5t69 -----TAQASVPLTSESFVAAVSR-----GPAVVRIDTETVVTRRTDPI
4ic5 -----EQFKEKEEELEEEERNVNLFQKT-----SPSVVYIEA-----
4ic6 -----VFPAGPLFPTEGRIVQLFEKN-----TYSVVNIFD-----
3qo6 -----KLQTD EL-----ATVRLFQEN-----TPSVVYITN-----
```

:

|      |                                                   |                |
|------|---------------------------------------------------|----------------|
| 4fln | -----THTAPDYSLPWQKQ-----RQFTSTGS                  | AFMIG-         |
| 5ilb | -----THTAPDYSLPWQKQ-----RQFTSTGS                  | AFMIG-         |
| 5jyk | V-----KVFCVHTEPNFSLPWQRK-----RQYSSGSS             | GFIIG-         |
| 5fht | -----LDRHPFLGREVP-----SNGSGFVVA                   | A              |
| 3nzi | -----FRKLPPFSKREVP-----ASGSGFIVSE                 |                |
| 4ri0 | -----FLRHPLFGRNVPL-----SSGSGFIMSE                 |                |
| 6z05 | PLDDFFNDPYFKQFFDFDFPQRKGKNDK-----EVS              | SSLGSGVIISK    |
| 2z9i | -----DLGRQSE-----GSGIILSA                         |                |
| 5zvj | -----VSDQEGM-----QSGSVIVDG                        |                |
| 3gdv | -----RGLNTNSHNQLEIR-----TLGSGVIMDQ                |                |
| 7co3 | F-----DDPMFRRFFGDNLPQK-----RMES                   | SSLGSAVIMSA    |
| 3pv5 | -----NDVTPPGSAGNDEENQPNRPPQSRMPEKG-----           | RKFESIGSGVIIDP |
| 4ynn | -----ASGNADDDGGENSKQPSRIPEKG-----                 | RKFESIGSGVIIDP |
| 4a9g | -----IPEEFKKFFGDDLPDQPA-----QPF                   | EGLGSGVIINA    |
| 2zle | -----MPRNFQQFFGDDSPFCQEGSPFQSSPFCQGGQGGNGGGQQQKFM | ALGSGVIIDA     |
| 6jjo | -----MPRNFQQFFGDDSPFCQEGSPFQSSPFCQGGQGGNGGGQQQKFM | ALGSGVIIDA     |
| 5t69 | L-----DDPFFQEFFGRSFPVPPRE-----RRIAGQGS            | GFIIDN         |
| 4ic5 | -----IEL-PKTSSGDILTDEEN-----GKIEGTGS              | GFVWDK         |
| 4ic6 | -----VTLRPQLKMTGVVEIP-----EGNGSGV                 | VWDG           |
| 3qo6 | -----LAVRQDAFTLDVLEVP-----QSGSG                   | GFVWDK         |

. \* . . :

|      |                                                              |  |
|------|--------------------------------------------------------------|--|
| 4fln | -DGKLLTNAHCVEHD--T-----QVKVKRRGDDR-KYVAKVLVRGVDCDIALLSVE     |  |
| 5ilb | -DGKLLTNAHCVEHD--T-----QVKVKRRGDDR-KYVAKVLVRGVDCDIALLSVE     |  |
| 5jyk | -GRRVLTNAHSVEHH--T-----QVKLKRGSdT-KYLATVLAIGTECDIALLTVT      |  |
| 5fht | -DGLIVTNAHVADR--R-----RVRVRLSG-D-TYEAVVTAVDPKADIATLRIQ       |  |
| 3nzi | -DGLIVTNAHVVTNK--H-----RVKVELKNG-A-TYEAKIKDVDEKADIALIKID     |  |
| 4ri0 | -AGLIITNAHVSSN--SAAPGRQ---QLKVQLQNG-D-SYEATIKDIDKSDIATIKIH   |  |
| 6z05 | -DGYIVTNNHVVDDA--D-----TITVNLPGSDI-EYKAKLIGKDPKTDLAVIKIE     |  |
| 2z9i | -EGLILTNNHVIAAA--AKPPLGSPPPKTTVTFSdg-R-TAPFTVVGADPTSdiAVVRVQ |  |
| 5zvj | -RGYIVTNNHVISEA--ANNPSQF--KTTVVFNdg-K-EVPANLVGRDPKTDLAVLKVD  |  |
| 3gdv | -RGYIITNKHVINDA--D-----QIIVALQDG-R-VFEALLVGSDSLTDLAVLKIN     |  |
| 7co3 | -EGYLLTNNHVTAGA--D-----QIIVALRDG-R-ETIAQLVGSDPETDLAVLKID     |  |
| 3pv5 | NNGVIIITNDHVIRNA--S-----LITVTLQDG-R-RLKARLIGGDSETDLAVLKID    |  |
| 4ynn | KNGIITNDHVIRNA--N-----LITVTLQDG-R-RLKARLIGGDSETDLAVLKID      |  |
| 4a9g | SKGYVLTNNHVINQA--Q-----KISIQLNdg-R-EFDAKLIGSDDQSDIALLQIQ     |  |
| 2zle | DKGYVVTNNHVDNA--T-----VIKVQLSDG-R-KFDAKMVGKDPRSDIALIQIQ      |  |
| 6jjo | DKGYVVTNNHVDNA--T-----VIKVQLSDG-R-KFDAKMVGKDPRSDIALIQIQ      |  |
| 5t69 | -SGIILTNAHVVDGA--S-----KVVVTLRDG-R-TFDGQVRGTDEVTDLAVVKIE     |  |
| 4ic5 | -LGHIVTNYHVIAKL--ATDQFGLQRCKVSLVDAKGTRFSKEGKIVGLDPDNDLAVLKIE |  |
| 4ic6 | -QGYIVTNYHVIGNALSRNPSPGDVVGRVNIASDGVQKNFEGKLVGADRADKDLAVLKVD |  |
| 3qo6 | -QGHIVTNYHVIRGA--S-----DLRVTLADQ-T-TFDAKVVGFDQDKDVAVLRID     |  |

: : \* \* \*

:

:

.

\* : \* : :

|      |                                                                 |
|------|-----------------------------------------------------------------|
| 4fln | SEDFWKGAEPRLRLGHLPRQLQDSVTVVGYPLGG----DTISVTKGVVSRIEVT-----SYA  |
| 5ilb | SEDFWKGAEPRLRLGHLPRQLQDSVTVVGYPLGG----DTISVTKGVVSRIEVT-----SYA  |
| 5jyk | DDEFWEGVSPVEFGDLPALQDAVTVVGYPIGG----DTISVTSGVVSRIEVT-----SYV    |
| 5fht | TKEP-LPTLPLGRSADVRQGEFVVAMGSPFAL-----QNTITSGIVSSAQRPAR---DLG    |
| 3nzi | HQ GK-LPVLLLGRSSELRLPGEFVVAIGSPFSL-----QNTVTTGIVSTTQRGGK---ELG  |
| 4ri0 | PKKK-LPVLLLGRSSELRLPGEFVVAIGSPFAL-----QNTVTTGIVSTTQRGGK---ELG   |
| 6z05 | ANN--LSAITFTNSDDLMEGDVVFALGNPFGLV-----GFSVTSGIISALNK-----DNI    |
| 2z9i | GVSG-LTPISLGSSDDLRLVGQPVLAIGSPFGL-----EGTVTTGIVSALNRPVSTTGEAG   |
| 5zvj | NVDN-LTVARLGDSSKVRVGDEVLAVGAPLGL-----RSTVTQGIVSALHRPVPLSGEGS    |
| 3gdv | ATGG-LPTIPINARRVPHIGDVVLAIGNPYNL-----GQTITQGIISATGR-----IGL     |
| 7co3 | LKN--LPAMTLGRSDGIRTDVCLLAIGNPFGLV-----GQTVTMGIISATGR-----NQL    |
| 3pv5 | AKN--LKS LVIGDSKLEVGDFVVAIGNPFGLNSFGNSQSATFGIVSALKR-----SDL     |
| 4ynn | AKN--LKS LVIGDSKLEVGDFVVAIGNPFGLNSFGNSQSATFGIVSALKR-----SDL     |
| 4a9g | NPSK-LTQIAIADSDKLRVGDFAVAVGNPFGL-----GQTATSGIVSALGR-----SGL     |
| 2zle | NPKN-LTAIKMADSDALRVGDYTVVAIGNPFGL-----GETVTSIVSALGR-----SGL     |
| 6jjo | NPKN-LTAIKMADSDALRVGDYTVVAIGNPFGL-----GETVTSIVSALGR-----SGL     |
| 5t69 | PQGSALPVAPLGTSSNLQVGDWAIIVGNPVGL-----DNTVTLGIIISTLGRSAA---QAG   |
| 4ic5 | TEGRELNPVVLGTSNDRVGQSCFAIGNPYGY-----ENTLTIGVVSGLGREI---PSP      |
| 4ic6 | APETLLKPIKVGQSNLSKVGQQCLAIGNPFGLV-----DHTLTVGVISGLNRDI---FSQ    |
| 3qo6 | APKNKLRPIPVGVSAADLVGQKVFVAIGNPFGLV-----DHTLTVGVISGLNRREIS---SAA |

. : .:\* \* : \* \*::\*

|      |                                                              |
|------|--------------------------------------------------------------|
| 4fln | HGSSDLLGIQIDAAINPGNSGGPAFNDQGEICIGVAFQV--YRSEETE-----NIGYVIP |
| 5ilb | HGSSDLLGIQIDAAINPGNSGGPAFNDQGEICIGVAFQV--YRSEETE-----NIGYVIP |
| 5jyk | HGSTELLGLQIDAAINSGNSGGPAFNDKGKCVGIAFQS--LKHEDAE-----NIGYVIP  |
| 5fht | LPQTNVEYIQTDAAIDFGNAGGPLVNLDGEVIGVNTMK--VTA-----GISFAIP      |
| 3nzi | LRNSDMDYIQTDAAINPGNSGGPLVNLDGEVIGINTLK--VTA-----GISFAIP      |
| 4ri0 | LRDSMDYIQTDAAINPGNSGGPLVNLDGEVIGINTLK--VTA-----GISFAIP       |
| 6z05 | GLNQYENFIQTDASINPGNSGGALVDSRGYLVGINSAI--LSR--GGG---NNGIGFAIP |
| 2z9i | NQNTVLDAIQTDAAINPGNSGGALVNMAQLVGVNSAIATLGADSADAQSGSIGLGFAIP  |
| 5zvj | DTDTVIDAIQTDASINHGNAAGPLIDMDAQVIGINTAG--KSLSDSAS----GLGFAIP  |
| 3gdv | NPTGRQNFLQTDASINPGNSGGALVNSLGELMGINTLS--FDKSNDE--TPEGIGFAIP  |
| 7co3 | GLNTYEDFIQTDAAINPGNAGGALVDAAGNLIGINTAI--FSK--SGG---SQGIGFAIP |
| 3pv5 | NIEGVENFIQTDAAIGGGNSGGALVNAKGELIGINTAI--LSP--YGG---NVGIGFAIP |
| 4ynn | NIEGVENFIQTDAAINPGNAGGALVNAKGELIGINTAI--ISP--YGG---NVGIGFAIP |
| 4a9g | NLEGLNFIQTDASINRGNAGGALLNLNDELIGINTAI--LAP--GGG---SVGIGFAIP  |
| 2zle | NAENYENFIQTDAAINRGNSGGALVNLNDELIGINTAI--LAP--DGG---NIGIGFAIP |
| 6jjo | NAENYENFIQTDAAINRGNAGGALVNLNDELIGINTAI--LAP--DGG---NIGIGFAIP |
| 5t69 | IPDKRVEFIQTDAAINPGNAGGPLLARGEVIGINTAI--RAD-----ATGIGFAIP     |
| 4ic5 | NGKSISEAIQTDADINSNAGGPLLDSYGHITIGVNTAT--FTRKSGSM---SSGVNFAIP |
| 4ic6 | TGVTIGGGIQTDAAINPGNAGGPLLDSKGNLIGINTAI--FTQ--TGT---SAGVGFAIP |
| 3qo6 | TGRPIQDVIQTDAAINPGNSGGPLLDSSTLIGINTAI--YSP--SGA---SSGVGFSIP  |

:\* \*\* \*. \*\*:\*\*\*. .: . :\*: .:: \*\*

|      |                                                              |
|------|--------------------------------------------------------------|
| 4fln | TTVVSFLTD-----YERNKYTGYPCLGVLLQKLENPALR-----ECLKVP---TN-E    |
| 5ilb | TTVVSFLTD-----YERNKYTGFPVLGIEWQKMENPDLR-----KSMGME---SHQK    |
| 5jyk | TPVIVHFIQD-----YEKHDKYTGFPVLGIEWQKMENPDLR-----KSMGME---SHQK  |
| 5fht | SDRLREFLHRGEKKNSSSGISGSQ-RRYIGVMMLTL-SPSILAELQLREPSFP---DVQH |
| 3nzi | SDKIKKFLTESHDRQ-AGKKAITK-KKYIGIRMMSL-TSSKAKELKDRHRDFP---DVIS |
| 4ri0 | SDRITRFLTEFQ----DKQIKDWK-KRFIGIRMRTI-TPSLVDELKASNPDPF---EVSS |
| 6z05 | SNMVKDIAKK-----LIEKGKID-RGFLGVITILAL-QGDTK-----KAYKNQ-----E  |
| 2z9i | VDQAKRIADE-----LISTGKAS-HASLGVQVT---NDKDT-----L              |
| 5zvj | VNEMKLVANS-----LIKDGKIV-HPTLGISTRV-SNAIA-----S               |
| 3gdv | FQLATKIMDK-----LIRDGRVI-RGYIGIGREI-APLHA-----QGGID---QL-Q    |
| 7co3 | TKLAEVMSQ-----IIIEHGQVI-RGWLGVVKAAL-TPELA-----ESLGLG---ET-A  |
| 3pv5 | INMVKDVAQQ-----IIKFGSIH-RGLMGIFVQHL-TPELA-----QAMGYP---EDFQ  |
| 4ynn | INMAKDVAQQ-----IIKFGSIH-RGLMGIFVQHL-TPELA-----QSMGYA---EDFQ  |
| 4a9g | SNMARTLAQQ-----LIDFGEIK-RGLLGIGTEM-SADIA-----KAFNID---VQ-R   |
| 2zle | SNMVKNLTSQ-----MVEYGQVK-RGELGIMGTEL-NSELA-----KAMKVD---AQ-R  |
| 6jjo | SNMVKNLTSQ-----MVEYGQVK-RGELGIMGTEL-NSELA-----KAMKVD---AQR   |
| 5t69 | IDQAKAIQNT-----LAAGGTVP-HPYIGVQMMNI-TVDQA-QQNNRNPNSPFIIPVVD  |
| 4ic5 | IDTVVRTVPY-----LIVYGTAY-RDRLSS-----VDKLA-----                |
| 4ic6 | SSTVLKIVPQ-----LIQFSKVL-RAGINIELA---PDPVA-----NQLNVR-----N   |
| 3qo6 | VDTVGGIVDQ-----LVRFGKVT-RPILGIKF---APDQS-----VEQLGV-----S    |

∴

|      |                                                         |
|------|---------------------------------------------------------|
| 4fln | GVLVRRVEPTSDASKV-LKE-----GDVIVSFDDLHVCGEGTVPFRSSERIAFR  |
| 5ilb | GVRIRRIEPTAPESQV-LKP-----SDIILSFDGVNIANDGTVPFRHGERIGFS  |
| 5jyk | GVRIRRIEPTAPESQV-LKP-----SDIILSFDGVNIANDGTVPFRHGERIGFS  |
| 5fht | GVLIIHKVILGSPAHRAGLRP-----GDVILAIGEOMV-----QNAEDVY      |
| 3nzi | GAYIIIEVIPDTPAEAGGLKE-----NDVIIISINGQSV-----VSANDVS     |
| 4ri0 | GIYVQEVPNPSQSGGIQD-----GDIIVKVNGRPL-----VDSSELQ         |
| 6z05 | GALITDVQKGSSADEAGLKR-----GDLVTKVNNKVI-----KSPIDLK       |
| 2z9i | GAKIVEVVAGGAAANAGVPK-----GVVVTKVDDRPI-----NSADALV       |
| 5zvj | GAQVANVKAGSPAQKGGILE-----NDVIVKVGNRAV-----ADSDEFV       |
| 3gdv | GIVVNEVSPDGPAANAGIQV-----NDLIISVDNKPA-----ISALETM       |
| 7co3 | GIVVAGVYRDGPAARGGLLP-----GDVILTIDKQEA-----SDGRRSM       |
| 3pv5 | GALVSQVNPNSPAELAGLKA-----GDIITQINDTKI-----TQATQVK       |
| 4ynn | GALVSQVNQNSPAQLAGLKS-----GDVIVQINDTKI-----TQATQVK       |
| 4a9g | GAFVSEVLPGSGSAKAGVKA-----GDIITSLNGKPL-----NSFAELR       |
| 2zle | GAFVSQVLPNSSAAKAGIKA-----GDVITSLNGKPI-----SSFAALR       |
| 6jjo | GAFVSQVLPNSSAAKAGIKA-----GDVITSLNGKPI-----SSFAALR       |
| 5t69 | GILVMRVLPGTPAERAGIRR-----GDVIVAVDGTPI-----SDGARLQ       |
| 4ic5 | -----                                                   |
| 4ic6 | GALVLQVPGKSLAEKAGLHPTSRGFAGNIVLGDIVAVDDKPV-----KNKAELM  |
| 3qo6 | GVLVLDAPPSGPAGKAGLQSTKRDGYGRLVLGDIITSVNGTKV-----SNGSDLY |

|      |                                      |                                 |
|------|--------------------------------------|---------------------------------|
| 4fln | YLISQKFAGDIAEIGII-RAGEHKKVQVVL       | RPRVHLVPYHIDGGQPSYIIIVAGLVFTPLS |
| 5ilb | YLISQKYTGDSALVKVL-RNKEILEFNIKLA      | IAHKRLIPAHISGKPPSYFIVAGFVFTTVS  |
| 5jyk | YLISQKYTGDSALVKVL-RNKEILEFNIKLA      | IAHKRLIPAHISGKPPSYFIVAGFVFTTVS  |
| 5fht | EAVRT---QSQLAVQIR-RGRETTLTYVTPEVTE   | -----LEHHHHHH-----              |
| 3nzi | DVIKR---ESTLNMVVR-RGNEDIMITVIPEEID   | ---PRSLEHHHHHH-----             |
| 4ri0 | EAVLT---ESPLLLEVR-RGNDDLLFSIAPEVVMG  | -----GHHHHHH-----               |
| 6z05 | NYIGTLEIGQKISLSYE-RDGENKQASFILKGEKEN | PKGVS--DLIDGLSLRNLDPRLK         |
| 2z9i | AAVRSKAPGATVALTFQDPSGGSR             | TVQVTLGKAEQ-----LEHHHHHH-----   |
| 5zvj | VAVRQLAIGQDAPIEVV-REGRHVTLTVKPD      | PDSTKLAAALEHHHHHH-----          |
| 3gdv | AQVAEIRPGSVIPVVVM-RDDKQLTLQVTIQEY    | PATN-----                       |
| 7co3 | NQVARTRPGQKISIVVL-RNGQKVNLTAEVGLR    | PPPPAPAPQQKQDGGE-----           |
| 3pv5 | TTISLLRVGSTVKIIVE-RDNKPLTLSAVVT      | DIKSHEQKLQSNNFLYGLALRAFEQESP    |
| 4ynn | TTISLLRAGSTAKIKIL-RDNKPLTLDVEVTD     | IKKHEQKLQSNNFLYGLALRNFEQESP     |
| 4a9g | SRIATTEPGTKVKLGLL-RNGKPLEVEVTLDT     | STSSASAEMITPALEGATLSDGQL---     |
| 2zle | AQVGTMPVGSKLTGLL-RDGKQVNVNLELQ       | QSSQNQVDSSSIFNGIEGAEMSN-----    |
| 6jjo | AQVGTMPVGSKLTGLL-RDGKQVNVNLELQ       | QSSQNQVDSSSIFNGIEGAEMSN-----    |
| 5t69 | RIVEQAGLNKALKLDLL-RGDRRLSLTVQTA      | QLRNPTS-----                    |
| 4ic5 | -----                                | -----AALEHHHHHH-----            |
| 4ic6 | KILDEYSVGDKVTLKIK-RGNEDLELKISLEEKSS  | -----LEHHHHHH-----              |
| 3qo6 | RILDQCKVGDEVTVLVL-RGDHKEKISVTLEPK    | PDESAAALEHHHHHH-----            |

|      |                                  |                                    |                   |
|------|----------------------------------|------------------------------------|-------------------|
| 4fln | EPLIE----                        | EECEDTIGLKLLTKARYSVARFRGEQIVILSQVL | ANEVNIGYEDMNNQQVL |
| 5ilb | VPYLRSEYGKEYEFDAPVKLLEKHLHAMAQSV | DEQLVVVSQVLVSDINIGYEEIVNTQVV       |                   |
| 5jyk | VPYLRSEYGKEYEFDAPVKLLEKHLHAMAQSV | DEQLVVVSQVLVSDINIGYEEIVNTQVV       |                   |
| 5fht | -----                            |                                    |                   |
| 3nzi | -----                            |                                    |                   |
| 4ri0 | -----                            |                                    |                   |
| 6z05 | DRLQI-----                       | PKDVNGVLVDSVKEKSKGKNS              | GFQEGDIIII        |
| 2z9i | -----                            |                                    |                   |
| 5zvj | -----                            |                                    |                   |
| 3gdv | -----                            |                                    |                   |
| 7co3 | -----                            |                                    |                   |
| 3pv5 | P-----                           | HGNVIGVQVVGASENSAGWRAGIRPGDIIII    |                   |
| 4ynn | P-----                           | HGNVVGQVVGASETSAGWRAGIRPGDIIII     |                   |
| 4a9g | -----                            | KDGGKGIKIDEVVKGSPAAQAGLQKDDV       | II                |
| 2zle | -----                            | KGKDQGVVVNNVKTGTPAAQIGLKKGDV       | II                |
| 6jjo | -----                            | KGKDQGVVVNNVKTGTPAAQIGLKKGDV       | II                |
| 5t69 | -----                            |                                    |                   |
| 4ic5 | -----                            |                                    |                   |
| 4ic6 | -----                            |                                    |                   |
| 3qo6 | -----                            |                                    |                   |

|      |                                                              |
|------|--------------------------------------------------------------|
| 4fln | KFNGIPIRNIHHLAHLIDMCKDKYLVFEFEDNYVAVLEREASNSASLCILKDYGIPSERS |
| 5ilb | AFNGKPVKNLKGLAGMVENCEDEYMKFNLDYDQIVVLDTKTAKEATLDILTTHCIPSAMS |
| 5jyk | AFNGKPVKNLKGLAGMVENCEDEYMKFNLDYDQIVVLDTKTAKEATLDILTTHCIPSAMS |
| 5fht | -----                                                        |
| 3nzi | -----                                                        |
| 4ri0 | -----                                                        |
| 6z05 | GVGQSEIKNLKDLEQALKQVNKKEFTKVWVYRNGFATLLVLK-----              |
| 2z9i | -----                                                        |
| 5zvj | -----                                                        |
| 3gdv | -----                                                        |
| 7co3 | -----                                                        |
| 3pv5 | SANKKPVTDVKSLQTIAQEKKKELLVQVLRGPGSMYLLVI-----                |
| 4ynn | SANKTPVKDIKSLQAVAHEKGKQLLVQVLRGAGALYLLII-----                |
| 4a9g | GVNRDRVNSIAEMRKVLAAPAIIALQIVRGNESIYLLMRLEHHHHHH-----         |
| 2zle | GANQQAVKNIAELRKVLDSKPSVLALNIQRGDSTIYLLMQ-----                |
| 6jjo | GANQQAVKNIAELRKVLDSKPSVLALNIQRGDSTIYLLMQ-----                |
| 5t69 | -----                                                        |
| 4ic5 | -----                                                        |
| 4ic6 | -----                                                        |
| 3qo6 | -----                                                        |

|      |                                         |
|------|-----------------------------------------|
| 4fln | ADLLEPYVDPIDDTQALDQGIGDSPVSNLEIGFDGLVWA |
| 5ilb | DDLKTEERN-----                          |
| 5jyk | DDLKTEERN-----                          |
| 5fht | -----                                   |
| 3nzi | -----                                   |
| 4ri0 | -----                                   |
| 6z05 | -----                                   |
| 2z9i | -----                                   |
| 5zvj | -----                                   |
| 3gdv | -----                                   |
| 7co3 | -----                                   |
| 3pv5 | -----                                   |
| 4ynn | -----                                   |
| 4a9g | -----                                   |
| 2zle | -----                                   |
| 6jjo | -----                                   |
| 5t69 | -----                                   |
| 4ic5 | -----                                   |
| 4ic6 | -----                                   |
| 3qo6 | -----                                   |

**Figure S2: Frequency of HtrA Repeats in Random Protein Sequences**

Comparison of the scoring of random protein sequences to the HtrA repeat sequence. All the randomly generate possible sequences were scored according to a Bernoulli statistical model and the scores were binned. The fraction of sequences that occurred in each bin is plotted against the minimum score for that bin. Note that both axes are log based. A vertical red line indicates the score cutoff used to identify the HtrA repeat sequences within the sequence unique PDB set.

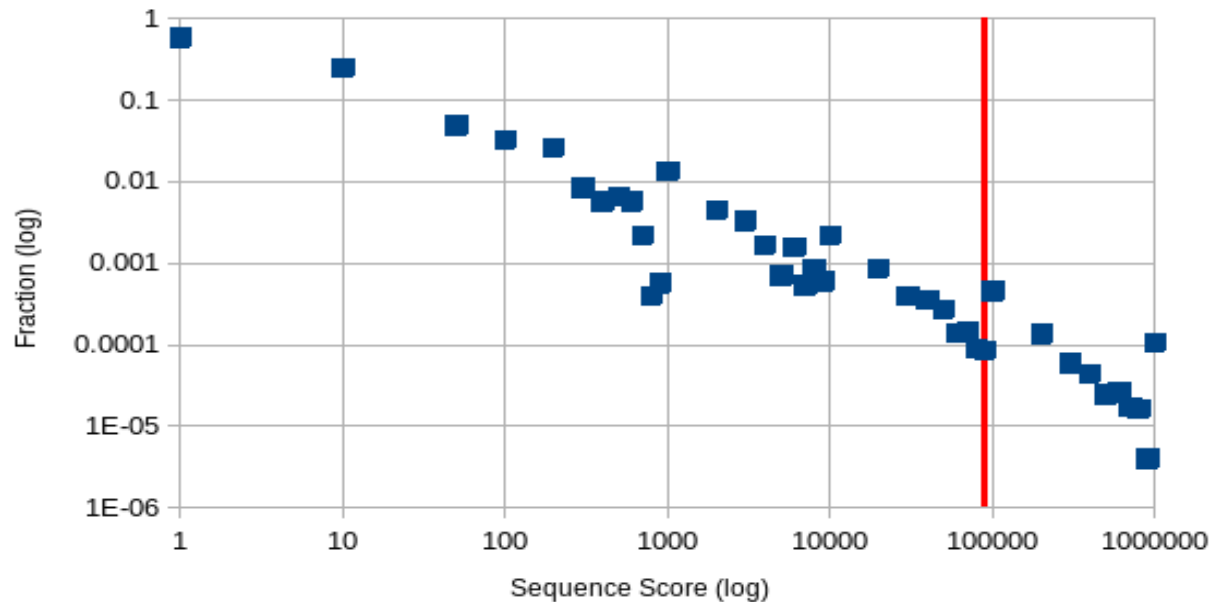



**Figure S3: Expected Protein Length of a Random Sequence Matching that Score to Occur**

The expected length of a protein in which a sequence scoring X or higher should occur randomly, as extrapolated from randomly generated protein sequences. That is, a protein of length N would be expected to have a section of sequence that scores at least as high as X somewhere within its length. Note the log scale of the y-axis. A vertical red line indicates the score cutoff used to identify HtrA repeat sequences, the same score as used in Fig. S2. The intersection of this red line and the data points indicates the expected length of a protein sequence needed for a random occurrence of a sequence scoring at least that high to occur within that protein, in this case 1031 residues.

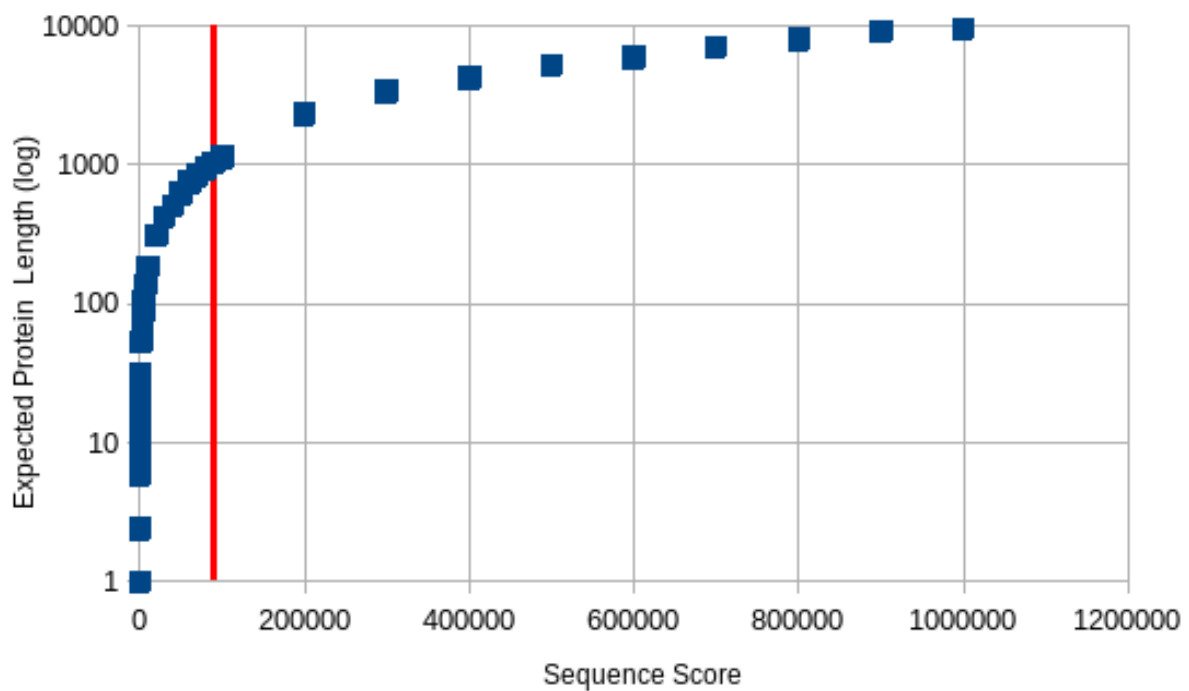

#### Figure S4: Identification of the $\beta$ -barrel Structures in the HtrA Proteases

The conserved  $\beta$ -barrel structures are explicitly identified by highlighting. The N-terminal protease module in cyan, the C-terminal protease module in magenta, PDZ-like 1 and PDZ-like 2 in orange and violet respectively.

CLUSTAL multiple sequence alignment by MUSCLE (3.8)

```
4fln      -----NAESSNPPQKMAFKAFG-----
5ilb      -----GHDASF-----
5jyk      -----MGSSHH-----HHHHSSGLVPRGSHMASMTGGQQMGRGSEFELLNNE
5fht      -----MAVP-----
3nzi      -----MG-----
4ri0      -----
6z05      -----
2z9i      -----ANMPP-----
5zvj      -----MVDAFTTSKVT-----
3gdv      -----MRGSHH-----HHHHGRSLNPLS-----
7co3      MPKALRFLGWPVLVGLLALLIIQHNPELVGLPRQEVHVEQ-----
3pv5      -----MRGSHH-----HHHHGSAEPPN-----
4ynn      -----MRGSHH-----HHHHGSAQDLT-----
4a9g      -----SIPGQVADQAP-----
2zle      -----
6jjo      -----MGSSHH-----HHHHSSGLVPRGSHMA-----
5t69      -----GIDPFTMADDLPAPVI-----
4ic5      -----MGSSHH-----HHHHSSGLVPRGSHMASAL-----
4ic6      -----MGLGDP-----SVATVEDVSPT-----
3qo6      -----MAAFVVSTPK-----
```

```
4fln      -----SPKKEKESLSDFSRDQQTDPAKIHDAFLNPAVVKVYC-----
5ilb      -----LNPAVVKVYC-----
5jyk      SEAGNQRTSSPERSRSLHHS DTKNGDCSNGMIVSTTTESIPAAPSWETVVKVPSMDAV
5fht      -----SPPPASPRSQYNFIADVVEKT-----APAVVYIEI-----
3nzi      -----QEDPNLSLRHKYNFIADVVEKI-----APAVVHIEL-----
4ri0      -----LHQLSSPRYKFNFIADVVEKI-----APAVVHIEL-----
6z05      -----VLSYHDS-----IKDA-----KKS VVNISTSKTITRANRPS
2z9i      -----GSVEQVAAKV-----VPSVVMLET-----
5zvj      -----LSTTGNAQEPAGRFTKVAAAV-----ADSVVTIES-----
3gdv      -----TPQFDSTDETPASYNLAVRRA-----APAVNVYN-----
7co3      -----APLLSRLQEGPVSYANAVSRA-----APAVANLYTTKMVSKPSHPL
3pv5      -----MPSMAPV-----LKNI-----MPAIVNVAVQGYP-----
4ynn      -----NMPSLAPVLKNA-----MPAIVNVAVQGYPNMM-----
4a9g      -----LP SLAPM-----LEKV-----LPAVVSVRVEGTASQGQK-----
2zle      -----AETSSATTAQQMP SLAPMLEKV-----MPSVVSINVEGSTTVNTPR-----
6jjo      -----ETSSATTAQQMP SLAPMLEKV-----MPSVVSINVEGSTTVNTPR-----
5t69      -----TAQASVPLTSESFVAAVSR-----GPAVVRIDTETVVTTRTDPI
4ic5      -----EQFKEKEEELEEEERNVNL FQKT-----SPSVVYIEA-----
4ic6      -----VFPAGPLFPTEGRIVQLFEKN-----TYSVVNIFD-----
3qo6      -----KLQTDEL-----ATVRLFQEN-----TPSVVYITN-----
```

:

|      |                                                             |
|------|-------------------------------------------------------------|
| 4fln | -----THTAPDYSLPWQKQ-----RQFTSTGSAFMIG-                      |
| 5ilb | -----THTAPDYSLPWQKQ-----RQFTSTGSAFMIG-                      |
| 5jyk | V----KVFCVHTEPNFSLPWQRK-----RQYSSGSSGFIIG-                  |
| 5fht | -----LDRHPFLGREVPI-----SNGSGFVVAA                           |
| 3nzi | -----FRKLPFSKREVPV-----ASGSGFIVSE                           |
| 4ri0 | -----FLRHPLFGRNVPL-----SSGSGFIMSE                           |
| 6z05 | PLDDFFNDPYFKQFFDFDFPQRKGKNDK-----EVSLSLGSVGIISK             |
| 2z9i | -----DLGRQSEE-----GSGIILSA                                  |
| 5zvj | -----VSDQEGM-----QSGSVIVDG                                  |
| 3gdv | -----RGLNTNSHNQLEIR-----TLGSGVIMDQ                          |
| 7co3 | F----DDPMFRRFFGDNLPQQK-----RMESSLGSVIMSA                    |
| 3pv5 | -----NDVTPPGSAGNDEENQPNRPPQSRMPEKG-----RKFESIGSGVIIDP       |
| 4ynn | -----ASGNADDDDGGENSKQPSRIPEKG-----RKFESIGSGVIIDP            |
| 4a9g | -----IPEEFKKFFGDDLDPQPA-----QPFEGLGSGVIINA                  |
| 2zle | -----MPRNFQQFFGDDSPFCQEGSPFQSSPFCQGGQGGNGGGQQQKFMALGSGVIIDA |
| 6jjo | -----MPRNFQQFFGDDSPFCQEGSPFQSSPFCQGGQGGNGGGQQQKFMALGSGVIIDA |
| 5t69 | L----DDPFFQEFFFGRSFPVPPRE-----RRIAGQSGSFIIDN                |
| 4ic5 | -----IEL-PKTSSGDILTDEEN-----GKIEGTGSGFVWDK                  |
| 4ic6 | -----VTLRPQLKMTGVVEIP-----EGNGSGVVDG                        |
| 3qo6 | -----LAVRQDAFTLDVLEVP-----QSGSGSFVWDK                       |

. \* . . :

|      |                                                               |
|------|---------------------------------------------------------------|
| 4fln | -DGKLLTNAHCVEHD--T-----QVKVKRRGDDR-KYVAKVLVRGVDCDIALLSVE      |
| 5ilb | -DGKLLTNAHCVEHD--T-----QVKVKRRGDDR-KYVAKVLVRGVDCDIALLSVE      |
| 5jyk | -GRRVLTNAHSVEHH--T-----QVKLKKRGSdT-KYLATVLAIGTECDIALLTVT      |
| 5fht | -DGLIVTNAHVADR--R-----RVRVRLLSG-D-TYEAVVTAVDPKADIATLRIQ       |
| 3nzi | -DGLIVTNAHVVTNK--H-----RVKVELKNG-A-TYEAKIKDVDEKADIALIKID      |
| 4ri0 | -AGLIITNAHVSSN--SAAPGRQ---QLKVQLQNG-D-SYEATIKDIDKKSIDIATIKIH  |
| 6z05 | -DGYIVTNNHVVDDA--D-----TITVNLPGSDI-EYKAKLIGKDPKTDLAVIKIE      |
| 2z9i | -EGLILTNNHVIAAA--AKPPLGSPPKTTVTTFSDG-R-TAPFTVVGADPTS DIAVVRVQ |
| 5zvj | -RGYIVTNNHVICEA--ANNPSQF---KTTVVFNDDG-K-EVPANLVGRDPKTDLAVLKVD |
| 3gdv | -RGYIITNKHVINDA--D-----QIIVALQDG-R-VFEALLVGSDSLTDLAVLKIN      |
| 7co3 | -EGYLLTNNHVTAGA--D-----QIIVALRDG-R-ETIAQLVGSDETDLAVLKID       |
| 3pv5 | NNGVIITNDHVIRNA--S-----LITVTLQDG-R-RLKARLIGDSETDLAVLKID       |
| 4ynn | KNGIITNDHVIRNA--N-----LITVTLQDG-R-RLKARLIGDSETDLAVLKID        |
| 4a9g | SKGYVLTNNHVINDA--Q-----KISIQLNDDG-R-EFDAKLIGSDQSDIALLIQIQ     |
| 2zle | DKGYVVTNNHVVDNA--T-----VIKVQLSDG-R-KFDAKMVGKDPKSDIALIQQ       |
| 6jjo | DKGYVVTNNHVVDNA--T-----VIKVQLSDG-R-KFDAKMVGKDPKSDIALIQQ       |
| 5t69 | -SGIILTNAHVVDGA--S-----KVVVTLRDG-R-TFDGQVRGTDEVTDLAVVKIE      |
| 4ic5 | -LGHIVTNYHVIACL--ATDQFGLQRCKVSLVDAGKTRFSKEGKIVGLDPDNDLAVLKIE  |
| 4ic6 | -QGYIVTNYHVIGNALSRNPSPGDVVRVNLASDGVQKNFEGKLVGADRAKDLAVLKVD    |
| 3qo6 | -QGHIVTNYHVIRGA--S-----DLRVTLADQ-T-TFDAKVVGFDQDKDVAVLRID      |

.: \* \* \* : : . \* : \* : :

|      |                                                                |
|------|----------------------------------------------------------------|
| 4fln | SEDFWKGAEPRLRLGHLPRLQDSVTVVGYPLGG----DTISVTKGVVSRIEVT-----SYA  |
| 5ilb | SEDFWKGAEPRLRLGHLPRLQDSVTVVGYPLGG----DTISVTKGVVSRIEVT-----SYA  |
| 5jyk | DDEFWEGVSPVEFGDLPALQDAVTVVGYPIGG----DTISVTSGVVSRMEIL-----SYV   |
| 5fht | TKEP-LPTLPLGRSADVRQGEFVAMGSPFAL-----QNTITSGIVSSAQRPAR---DLG    |
| 3nzi | HQGK-LPVLLLGRSSELRPGEFVVAIGSPFSL-----QNTVTTGIVSTTQRGGK---ELG   |
| 4ri0 | PKKK-LPVLLLGHSAIDLPRGEFVVAIGSPFAL-----QNTVTTGIVSTAQREGR---ELG  |
| 6z05 | ANN--LSAITFTNSDDLMEGDVVFALGNPFGV-----GFSVTSGIISALNK-----DNI    |
| 2z9i | GVSG-LTPISLGSSSDLRVGQPVLAIGSPLGL-----EGTVTTGIVSALNRPVSTTGEAG   |
| 5zvj | NVDN-LTVARLGDSSKVRVGDEVLA VGAPLGL-----RSTVTQGIVSALHRPVPLSGEGS  |
| 3gdv | ATGG-LPTIPINARRVPHIGDVVLAIGNPYNL-----GQTITQGIISATGR-----IGL    |
| 7co3 | LKN--LPAMTLGRSDGIRTDVCLAI GNPFGLV-----GQVTMTGIISATGR-----NQL   |
| 3pv5 | AKN--LKSLVIGDSDKLEVGDFVVAIGNPFGLNSFGNSQSATFGIVSALKR-----SDL    |
| 4ynn | AKN--LKSLVIGDSDKLEVGDYVVAIGNPFGLNSFGNSQSATFGIVSALKR-----SDL    |
| 4a9g | NPSK-LTQIAIADSDKLRVGDFAVAVGNPFGL-----GQTATSGIVSALGR-----SGL    |
| 2zle | NPKN-LTAIKMADSDALRVGDYTVAIGNPFGL-----GETVTSGIVSALGR-----SGL    |
| 6jjo | NPKN-LTAIKMADSDALRVGDYTVAIGNPFGL-----GETVTSGIVSALGR-----SGL    |
| 5t69 | PQGSALPVAPLGTSSNLQVGDWAIAGNPVGL-----DNTVTLGIISTLGRSAA---QAG    |
| 4ic5 | TEGRELNPVVLGTSNDLRVGQSCFAIGNPYGY-----ENTLTIGVVSGLGREI---PSP    |
| 4ic6 | APETLLKPIKVGQSNLSLVKGQSCFAIGNPYGF-----DHTLTGVISGLNRDI---FSQ    |
| 3qo6 | APKNKLRFIPVGVSA D L LVGQKVFAIGNPFGL-----DHTLTGVISGLRREIS---SAA |

. : . : \* \* : \* \* : \* :

```
4fln HGSSDLLGIQIDAAINPGNSGGPAFNDQGEICIGVAFQV--YRSEETE-----NIGYVIP
5ilb HGSSDLLGIQIDAAINPGNSGGPAFNDQGEICIGVAFQV--YRSEETE-----NIGYVIP
5jyk HGSTELLGLQIDAAINSGNSGGPAFNDKGCVCVIAFQS--LKHEDAE-----NIGYVIP
5fht LPQTNVEYIQTDAAIDFGNAGGPLVNLDEGEVIGVNTMK--VTA-----GISFAIP
3nzi LRNSDMDYIQTDAAIINYGNSSGGPLVNLDEGEVIGINTLK--VTA-----GISFAIP
4ri0 LRSDMDYIQTDAAIINYGNAGGPLVNLDEGEVIGINTLK--VTA-----GISFAIP
6z05 GLNQYENFIQTDASINPGNSGGALVDSRGYLVGINSAT--LSR--GGG---NNGIGFAIP
2z9i NQNTVLDIAIQTDAAINPGNSGGALVNMNAQLVGVNSAIATLGADSADAQSGSIGLGFAP
5zvj DTDVIDAIQTDASINHGNAAGGPLIDMDAQVIGINTAG--KSLSDSAS-----GLGFAIP
3gdv NPTGRQNFLQTDASINPGNSGGALVNSLGEIMGINTLS--FDKSNDGE--TPEGIGFAIP
7co3 GLNTYEDFIQTDAAINPGNAGGALVDAAGNLIGINTAI--FSK--SGG---SQGIGFAIP
3pv5 NIEGVENFIQTDAAIGGNSGGALVNAKGELIGINTAI--LSP--YGG---NVGIGFAIP
4ynn NIEGVENFIQTDAAINPGNAGGALVNAKGELIGINTAI--ISP--YGG---NVGIGFAIP
4a9g NLEGLNFIQTDASINRGNAGGALLNLNGELIGINTAI--LAP--GGG---SVGIGFAIP
2zle NAENYENFIQTDAAINRGNSSGGALVNLNGELIGINTAI--LAP--DGG---NIGIGFAIP
6jjo NAENYENFIQTDAAINRGNAGGALVNLNGELIGINTAI--LAP--DGG---NIGIGFAIP
5t69 IPDKRVEFIQTDAAINPGNAGGPLLNARGEVIGINTAI--RAD-----ATGIGFAIP
4ic5 NGKSISEAIQTDADINSGNAGGPLLDSYGHTIGVNTAT--FTRKSGSM---SSGVNFAIP
4ic6 TGVITGGGIQTDAAINPGNAGGPLLDSKGNLIGINTAI--FTQ--TGT---SAGVGFAIP
3qo6 TGRPIQDVIQTDAAINPGNSGGPLLDSSGTLIGINTAI--YSP--SGA---SSGVGFSIP
```

```
:* ** *. **: **. .: . :*: . . . . :*: . . . . :*: **
```

```
4fln TTVVSHFLTD-----YERNKGYTGYPCLGVLLQKLENPALR-----ECIKVP---TN-E
5ilb TTVVSHFLTD-----YERNKGYTGFPVLGIEWQKMENPDLR-----KSMGME---SHQK
5jyk TPVIVHFIQD-----YEKHDKYTGFPVLGIEWQKMENPDLR-----KSMGME---SHQK
5fht SDRLEFLHRGEKKNSSSGISGSQ--RRYIGVMMLTL--SPSILAEQLREPSFP---DVQH
3nzi SDKIKKFLTESHDRQ--AKGKAITK--KKYIGIRMMSL--TSSKAKELKDRHRDFP---DVIS
4ri0 SDRITRFLTEFQ---DKQIKDWK--KRFIGIRMRTI--TPSLVDELKASNPDPF---EVSS
6z05 SNMVKDIAKK-----LIEKGKID--RGLGVTILAL--QGDTK-----KAYKNQ-----E
2z9i VDQAKRIADE-----LISTGKAS--HASLGVQVT---NDKDT-----L
5zvj VNEMKLVANS-----LIKDGKIV--HPTLGISTRSV--SNAIA-----S
3gdv FQLATKIMDK-----LIRDGRVI--RGYIGIGGREI--APLHA-----QGGGID---QL-Q
7co3 TKLALVEMQS-----LIEHGQVI--RGWLGVEVKAL--TPELA-----ESLGLG---ET-A
3pv5 INMVKDVAQQ-----LIKFGSIH--RGLMGIFVQHL--TPELA-----QAMGYP---EDFQ
4ynn INMAKDVAQQ-----LIKFGSIH--RGLMGIFVQHL--TPELA-----QSMGYA---EDFQ
4a9g SNMARTLAQQ-----LIDFGEIK--RGLLGKIGTEM--SADIA-----KAFNLD---VQ-R
2zle SNMVKNLTSQ-----MVEYGQVK--RGELGIMGTEL--NSELA-----KAMKVD---AQ-R
6jjo SNMVKNLTSQ-----MVEYGQVK--RGELGIMGTEL--NSELA-----KAMKVD---AQR
5t69 IDQAKAIQNT-----LAAGGTVP--HPYIGVQMMNI--TVDQA--QQNNRNPNSPFIIPEVD
4ic5 IDTVVRTVPY-----LIVYGTAY--RDLRSS-----VDKLA-----
4ic6 SSTVLKIVPQ-----LIQFSKVL--RAGINIELA---PDPVA-----NQINVR-----N
3qo6 VDTVGGIVDQ-----LVRFGKVT--RPILGIKF---APDQS---VEQLGV-----S
```

:.

```
4fln GVLVRRVEPTSDASKV-LKE-----GDVIVSFDDLHVGCETVPFRSSERIAFR
5ilb GVRIRRIEPTAPESQV-LKP-----SDIILSFDGVNIANDGTVPFRHGERIGFS
5jyk GVRIRRIEPTAPESQV-LKP-----SDIILSFDGVNIANDGTVPFRHGERIGFS
5fht GVLIIHKVILGSPAHRAGLRP-----GDVILAIGE QMV-----QNAEDVY
3nzi GAYIIIEVIPDTPAEAGGLKE-----NDVIIISINGQSV-----VSANDVS
4ri0 GIYVQEVAPNPSQSGGIQD-----GDIIVKVNGRPL-----VDSSELQ
6z05 GALITDVQKGSSADEAGLKR-----GDLVTKVNNKVI-----KSPIDLK
2z9i GAKIVEVVAGGAAANAGVPK-----GVVVTKVDDRPI-----NSADALV
5zvj GAQVANVKAGSPAQKGGILE-----NDVIVKVGNRAV-----ADSDEFV
3gdv GIVVNEVSPDGPAAAGIQQV-----NDLIISVDNKPA-----ISALETM
7co3 GIVVAGVYRDGPAARGGLLP-----GDVILTIDKQEA-----SDGRRSM
3pv5 GALVSQVNPNSPAELAGLKA-----GDIITQINDTKI-----TQATQVK
4ynn GALVSQVNQNSPAQLAGLKS-----GDVIVQINDTKI-----TQATQVK
4a9g GAFVSEVLPGSGSAKAGVKA-----GDIITSLNGKPL-----NSFAELR
2zle GAFVSQVLPNSSAAKAGIKA-----GDVITSLNGKPI-----SSFAALR
6jjo GAFVSQVLPNSSAAKAGIKA-----GDVITSLNGKPI-----SSFAALR
5t69 GILVMRVLPGTTPAERAGIRR-----GDVIVAVDGTPI-----SDGARLQ
4ic5 -----
4ic6 GALVLQVPGKSLAEKAGLHPTSRGFAGNIVLGDIIIVAVDDKPV-----KNKAELM
3qo6 GVLVLDAPPSPGAGKAGLQSTKRDDGYGRLVLDGDIITSVNGTKV-----SNGSDLY
```

|      |                                       |                                  |
|------|---------------------------------------|----------------------------------|
| 4fln | YLISQKFAGDIAEIGII-RAGEHKKVQVVL        | RPRVHLVPYHIDGGQPSYIIVAGLVFTPLS   |
| 5ilb | YLISQKYTGDSALVKVL-RNKEILEFNI          | KLAIHKRLIPAHISGKPPSYFIVAGFVFTTVS |
| 5jyk | YLISQKYTGDSALVKVL-RNKEILEFNI          | KLAIHKRLIPAHISGKPPSYFIVAGFVFTTVS |
| 5fht | EAVRT---QSQLAVQIR-RGRETTLTYVTPEVTE    | -----LEHHHHHH-----               |
| 3nzi | DVIKR---ESTLNMVVR-RGNEDIMITVIPEEID    | ---PRSLEHHHHHH-----              |
| 4ri0 | EAVLT---ESPILLEVR-RGNDDLLFSI          | APEVVMG-----GHHHHHH-----         |
| 6z05 | NYIGTLEIGQKISLSYE-RDGENKQASFII        | KGEKENPKGVQS--DLIDGLSLRNLDPRLK   |
| 2z9i | AAVRSKAPGATVALTFQDPSSGGSRTVQVTLGKAEQ  | -----LEHHHHHH-----               |
| 5zvj | VAVRQLAIGQDAPIEVV-REGRHVTTLV          | KPDPDSTKLAAALEHHHHHH-----        |
| 3gdv | AQVAEIRPGSVIPVVVM-RDDKQLTLQVTIQEYPATN | -----                            |
| 7co3 | NQVARTRPGQKISIVVL-RNGQKVNLTAEV        | GLRPPAPAPAPQQKQDGGE-----         |
| 3pv5 | TTISLLRVGSTVKIIVE-RDNKPLTLSAVVT       | DIKSHEQKLQSNPNFLYGLALRAFEQESP    |
| 4ynn | TTISLLRAGSTAKIKIL-RDNKPLTLDVEVTD      | IKKHQKLQSNPNFLYGLALRNFEQESP      |
| 4a9g | SRIATTEPGTKVKLGLL-RNGKPLEVEVTLDT      | STSSSSASAEMITPALEGATLSDGQL---    |
| 2zle | AQVGTMFVGSKLTLGLL-RDGKQVNVNLELQQ      | SSQNQVDSSSIFNGIEGAEMS-----       |
| 6jjo | AQVGTMFVGSKLTLGLL-RDGKQVNVNLELQQ      | SSQNQVDSSSIFNGIEGAEMS-----       |
| 5t69 | RIVEQAGLNKALKDLL-RGDRRLSLTVQTA        | AQLRNPTS-----                    |
| 4ic5 | -----                                 | -----AALEHHHHHH-----             |
| 4ic6 | KILDEYSVGDKVTLKIK-RGNEDLELKISLEEKSS   | -----LEHHHHHH-----               |
| 3qo6 | RILDQCKVGDEVTVEVL-RGDHKEKISVTLEPK     | PDESAAALEHHHHHH-----             |

|      |                             |                                   |                            |
|------|-----------------------------|-----------------------------------|----------------------------|
| 4fln | EPLIE----                   | EECEDTIGLKLLTKARYSVARFRGEQ        | IVILSQVLANEVNIGYEDMNNQQVL  |
| 5ilb | VPYLRSEYGKEYEFDAPVKLLEKHLHA | MAQSVDEQLVVVSQVLVSDINIGYEEIVNTQVV |                            |
| 5jyk | VPYLRSEYGKEYEFDAPVKLLEKHLHA | MAQSVDEQLVVVSQVLVSDINIGYEEIVNTQVV |                            |
| 5fht | -----                       |                                   |                            |
| 3nzi | -----                       |                                   |                            |
| 4ri0 | -----                       |                                   |                            |
| 6z05 | DRLQI-----                  | PKDV                              | NGVLVDSVKEKSKGKNSGFQEGDIII |
| 2z9i | -----                       |                                   |                            |
| 5zvj | -----                       |                                   |                            |
| 3gdv | -----                       |                                   |                            |
| 7co3 | -----                       |                                   |                            |
| 3pv5 | P-----                      | HGNVIGVQVVGASENSAGWRAGIRPGDIII    |                            |
| 4ynn | P-----                      | HGNVVGQVVGASETSAGWRAGLRPGDIII     |                            |
| 4a9g | -----                       | KDGGKGIKIDEVVKGSPAAQAGLQKDDVII    |                            |
| 2zle | -----                       | KGKDQGVVNVNKTGTTPAAQIGLKKGDVII    |                            |
| 6jjo | -----                       | KGKDQGVVNVNKTGTTPAAQIGLKKGDVII    |                            |
| 5t69 | -----                       |                                   |                            |
| 4ic5 | -----                       |                                   |                            |
| 4ic6 | -----                       |                                   |                            |
| 3qo6 | -----                       |                                   |                            |

|      |                                          |                         |
|------|------------------------------------------|-------------------------|
| 4fln | KFNGIPIRNIHHLAHLIDMCKDKYLVFEFEDNYVAVLE   | BREASNSASLCILKDYGIPSERS |
| 5ilb | AFNGKPVKNLKGLAGMVENCEDEYMKFNLDYDQIVVLD   | TKTAKEATLDILTTHCIPSAMS  |
| 5jyk | AFNGKPVKNLKGLAGMVENCEDEYMKFNLDYDQIVVLD   | TKTAKEATLDILTTHCIPSAMS  |
| 5fht | -----                                    |                         |
| 3nzi | -----                                    |                         |
| 4ri0 | -----                                    |                         |
| 6z05 | GVGQSEIKNLKDLEQALKQVNKKEFTKVWVYRNGFATT   | LVLK-----               |
| 2z9i | -----                                    |                         |
| 5zvj | -----                                    |                         |
| 3gdv | -----                                    |                         |
| 7co3 | -----                                    |                         |
| 3pv5 | SANKKPVTDVKSLQTIAQEKKKELLVQVLRGPGSMYLLVI | -----                   |
| 4ynn | SANKTPVKDIKSLQAVAHEKGKQLLVQVLRGAGALYLLII | -----                   |
| 4a9g | GVNRDRVNSIAEMRKVLAAKPAIIALQIVRGNESIYLLM  | RLHHHHHH-----           |
| 2zle | GANQQAVKNIAELRKVLDSKPSVLALNIQRGDSTIYLLMQ | -----                   |
| 6jjo | GANQQAVKNIAELRKVLDSKPSVLALNIQRGDSTIYLLMQ | -----                   |
| 5t69 | -----                                    |                         |
| 4ic5 | -----                                    |                         |
| 4ic6 | -----                                    |                         |
| 3qo6 | -----                                    |                         |

|      |                                         |
|------|-----------------------------------------|
| 4fln | ADLLEPYVDPIDDTQALDQGIGDSPVSNLEIGFDGLVWA |
| 5ilb | DDLKTEERN-----                          |
| 5jyk | DDLKTEERN-----                          |
| 5fht | -----                                   |
| 3nzi | -----                                   |
| 4ri0 | -----                                   |
| 6z05 | -----                                   |
| 2z9i | -----                                   |
| 5zvj | -----                                   |
| 3gdv | -----                                   |
| 7co3 | -----                                   |
| 3pv5 | -----                                   |
| 4ynn | -----                                   |
| 4a9g | -----                                   |
| 2zle | -----                                   |
| 6jjo | -----                                   |
| 5t69 | -----                                   |
| 4ic5 | -----                                   |
| 4ic6 | -----                                   |
| 3qo6 | -----                                   |

**Figure S5: Secondary Structures of the HtrA Modules**

Cartoon representation of the secondary structures of  $\beta$ -barrel modules in the HtrA proteases. A) Arrangement of the strands in the protease domain modules. Strands are colored from N- to C-terminus in the order orange, yellow, green, cyan, blue, and magenta respectively. B) Arrangement of the strands in the PDZ-like domain modules. The PDZ-like domain modules have four strands that correspond to the same spatial positions in the protease domain modules and those strands are colored their equivalent color. There are no equivalent strands in the orange or magenta positions in the PDZ-like modules. Additionally, the first strand in the sequence which has been rotated out of the barrel is colored in grey. A sixth strand is present in some of the proteins, but it too has also been rotated out of the barrel and is colored in grey in the figure as well. Note that the alternating, antiparallel arrangement of the strands is maintained in the PDZ-like domains, even if it is formally reversed (as the definition of positive and negative is an arbitrary choice).

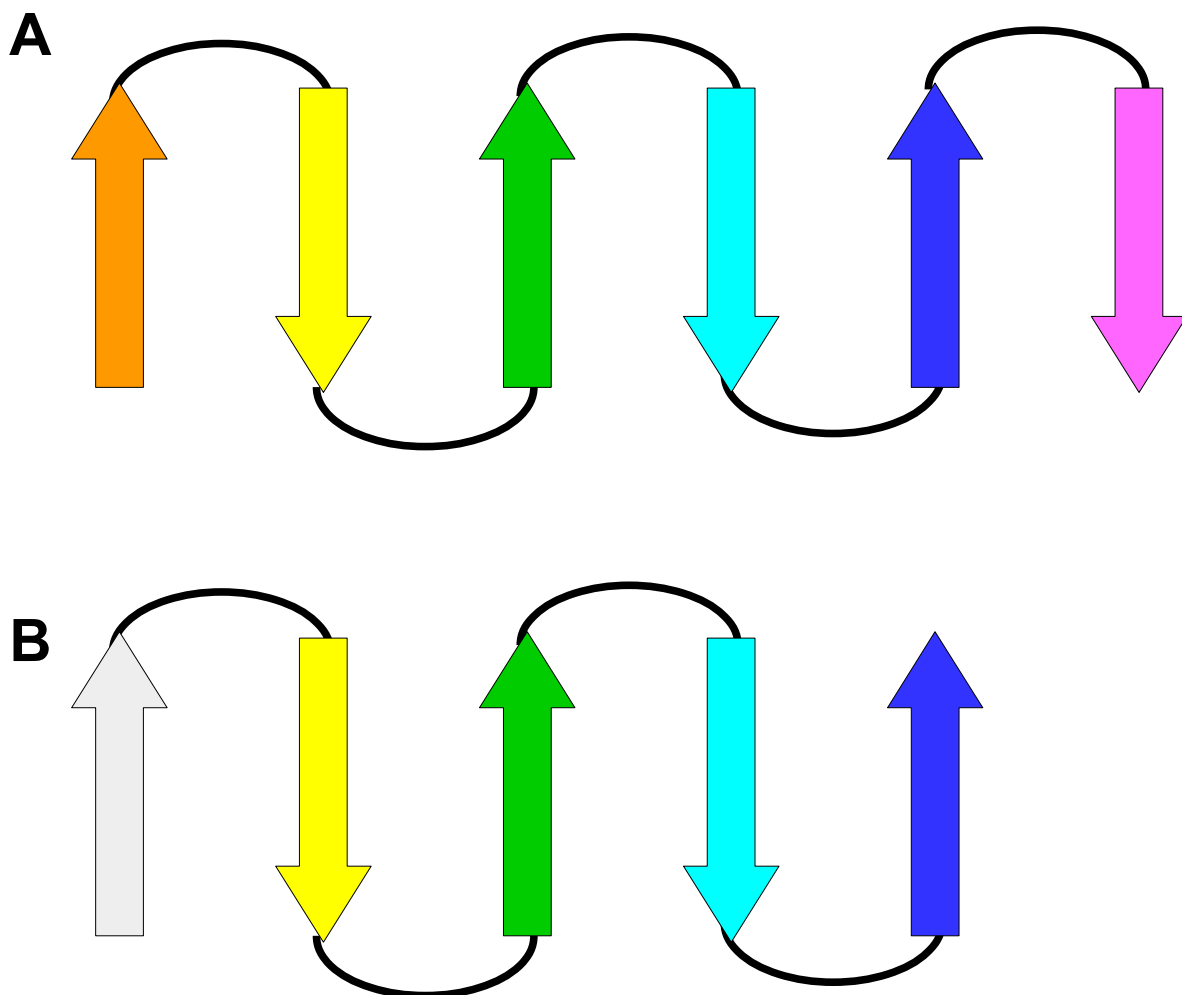

### **Figure S6: Structures of the HtrA Modules**

Cartoon representation of the modules of the sequence unique HtrA protease structures showing the alpha helices (red) and beta strands (yellow). Coil regions are hidden to simplify the images.

RMSDs are reported from PyMol using cealign to PDB ID 7co3. Figures were made with PyMol:

A) all the N-terminal protease modules (RMSD mean = 1.476 Å, median = 1.438 Å) B) all the C-terminal protease modules (RMSD mean = 2.382 Å, median = 2.397 Å) C) all the PDZ modules (RMSD mean = 2.687 Å, median = 2.598 Å) D) all modules (both protease and PDZ-like) (RMSD mean = 2.237 Å, median = 2.320 Å) E) all three modules from (PDB ID 5t69) with the individual strands colored based on their structural position (colors from N to C in the protease domain: orange, yellow, green, blue, and magenta)(RMSD mean = 1.748 Å, median = 1.816 Å)

A)

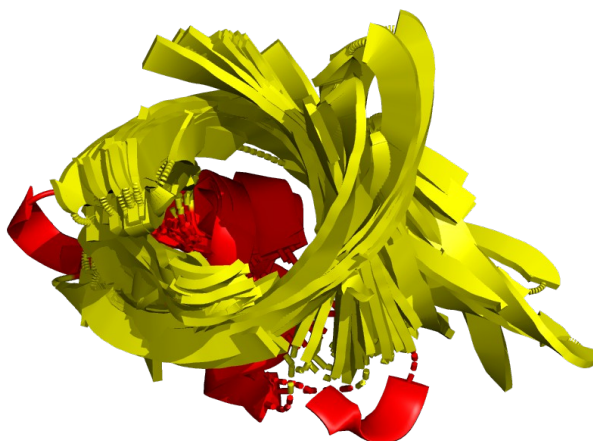

B)

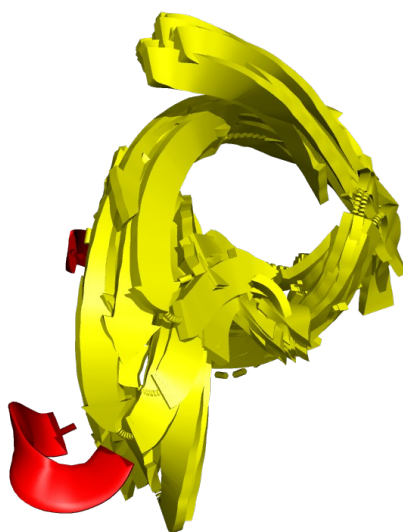



C)

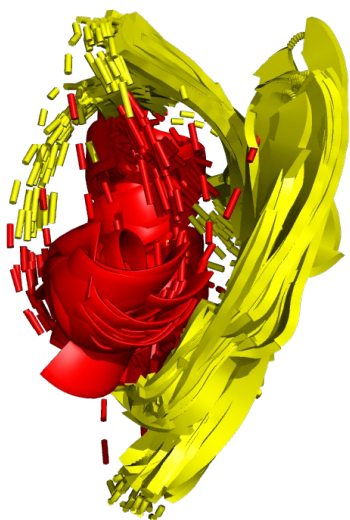

D)

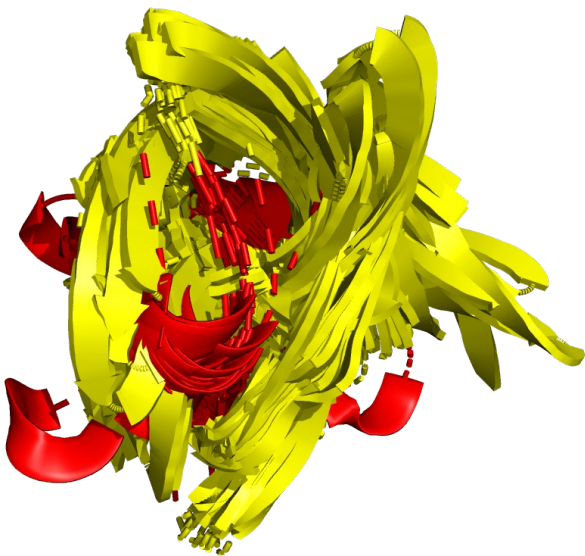

E)

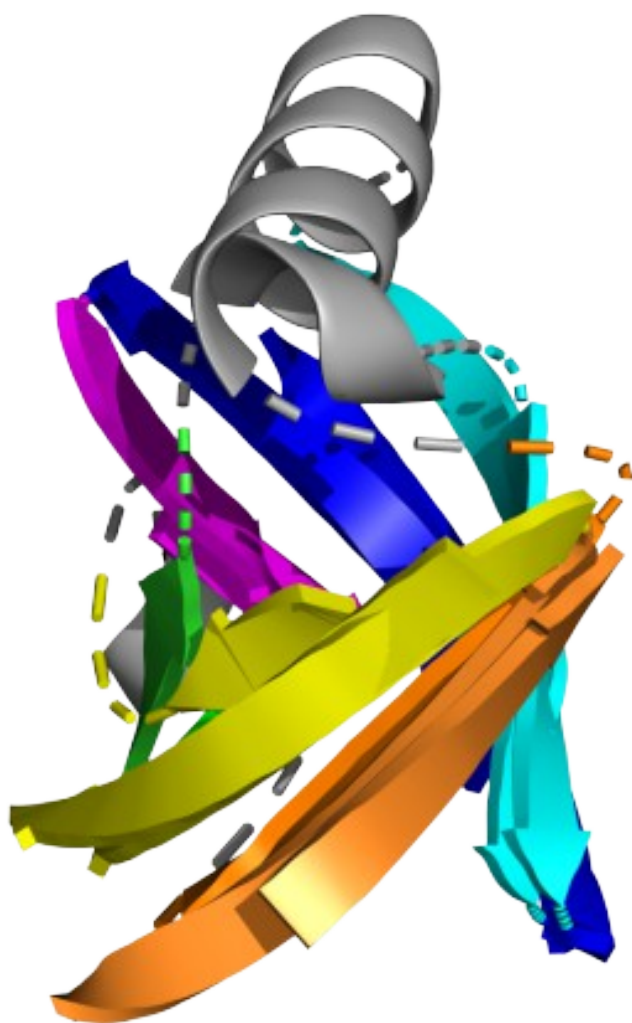

**Table S1: Domain Sequence Similarity Comparison**

Comparison of the average sequence identity between the different domains in the HtrA protease PDB structure set. Identity was calculated by pairwise comparison using the Needleman-Wunsch alignment method. Domains were defined using the PDB structures.

| <b>% ID (mean)</b> | <b>Protease</b> | <b>PDZ-like 1</b> | <b>PDZ-like 2</b> |
|--------------------|-----------------|-------------------|-------------------|
| <b>Protease</b>    | 20.1            |                   |                   |
| <b>PDZ-like 1</b>  | 18.2            | 21.2              |                   |
| <b>PDZ-like 2</b>  | 16.4            | 19.9              | 26.1              |

| <b>% ID (median)</b> | <b>Protease</b> | <b>PDZ-like 1</b> | <b>PDZ-like 2</b> |
|----------------------|-----------------|-------------------|-------------------|
| <b>Protease</b>      | 15.4            |                   |                   |
| <b>PDZ-like 1</b>    | 15.3            | 15.5              |                   |
| <b>PDZ-like 2</b>    | 14.2            | 16.3              | 17.1              |

**Table S2: Unmodified RMSD Comparison Table**

RMSD (Å) calculated (CE-align in PyMol) comparing modules from a given protein structure to its own other modules.

| <b>Protein</b>  | <b>Prot1-Prot2</b> | <b>Prot1-PDZ1</b> | <b>Prot2-PDZ1</b> | <b>Prot1-PDZ2</b> | <b>Prot2-PDZ2</b> | <b>PDZ1-PDZ2</b> |
|-----------------|--------------------|-------------------|-------------------|-------------------|-------------------|------------------|
| 2zle            | 4.67               | 5.39              | 9.87              | 9.20              | 8.58              | 2.89             |
| 2z9i            | 4.65               | 7.00              | 9.95              |                   |                   |                  |
| 3gdv            | 4.56               | 10.31             | 8.33              |                   |                   |                  |
| 3nzi            | 4.20               |                   |                   |                   |                   |                  |
| 3pv5            | 3.28               | 9.09              | 9.70              |                   |                   |                  |
| 3qo6            | 3.94               | 9.47              | 9.21              |                   |                   |                  |
| 4a9g            | 4.13               | 9.67              | 9.41              | 7.62              | 9.79              | 4.52             |
| 4fln            | 3.56               | 9.57              | 9.20              | 10.26             | 10.51             | 4.81             |
| 4ic5            | 5.26               |                   |                   |                   |                   |                  |
| 4ic6            | 4.43               | 8.83              | 9.80              |                   |                   |                  |
| 4ri0            | 5.02               | 7.70              | 6.89              |                   |                   |                  |
| 4ynn            | 3.40               | 9.18              | 10.27             | 10.34             | 9.60              | 2.41             |
| 5fht            | 4.19               | 9.52              | 9.58              |                   |                   |                  |
| 5ilb            | 3.42               | 8.85              | 9.16              | 10.05             | 7.97              | 4.95             |
| 5jyk            | 3.09               | 9.05              | 9.53              | 8.32              | 11.16             | 5.45             |
| 5t69            | 2.75               | 10.54             | 5.85              |                   |                   |                  |
| 5zvj            | 4.54               | 5.34              | 9.87              |                   |                   |                  |
| 6jjo            | 2.86               | 9.13              | 9.48              | 9.21              | 7.01              | 2.18             |
| 6z05            | 6.05               | 9.36              | 10.22             | 8.80              | 9.93              | 4.13             |
| 7co3            | 3.20               | 9.78              | 9.94              |                   |                   |                  |
| <b>Mean =</b>   | 4.06               | 8.77              | 9.24              | 9.22              | 9.32              | 3.92             |
| <b>Median =</b> | 4.16               | 9.16              | 9.56              | 9.20              | 9.70              | 4.32             |

**Table S3:  $\beta$ -barrel Comparison Summary Table**

Summary table for comparisons of the  $\beta$ -barrel modules in the HtrA proteases. “all” indicates that pairwise comparisons of all modules were included to calculate the comparison value. The listing “self” indicates only pairwise comparisons between protease or between PDZ-like modules were included. The listing “other” indicates pairwise comparisons of protease domains to PDZ-like domains were used to calculate the comparison value. The listing “proteases” indicates only comparisons between protease modules were used. “PDZ” indicates that only comparisons between PDZ-like modules were used to calculate the comparison values while “PDZ1” indicates only comparisons to the first PDZ-like domain were used.

**CEALIGN to self (RMSD, Å)**

|                 | <b>Proteases</b> | <b>Proteases to PDZ1</b> |
|-----------------|------------------|--------------------------|
| <b>Mean =</b>   | 4.060            | 9.002                    |
| <b>Median =</b> | 4.160            | 9.441                    |

**CEALIGN loops removed (RMSD, Å)**

|                 | <b>All</b> | <b>Self</b> | <b>Other</b> |
|-----------------|------------|-------------|--------------|
| <b>Mean =</b>   | 6.444      | 5.392       | 7.056        |
| <b>Median =</b> | 6.789      | 5.002       | 7.460        |

**CEALIGN to 5m3n (RMSD, Å)**

|                 | <b>N-protease</b> | <b>C-protease</b> | <b>PDZ1</b> |
|-----------------|-------------------|-------------------|-------------|
| <b>Mean =</b>   | 2.890             | 2.936             | 2.124       |
| <b>Median =</b> | 2.500             | 2.819             | 1.677       |

**TM Align (RMSD, Å)**

|                 | <b>Proteases</b> | <b>PDZ</b> | <b>Other</b> |
|-----------------|------------------|------------|--------------|
| <b>Mean =</b>   | 2.804            | 2.273      | 3.724        |
| <b>Median =</b> | 2.780            | 2.215      | 3.695        |

**TM Align (TM score)**

|                 | <b>Proteases</b> | <b>PDZ</b> | <b>Other</b> |
|-----------------|------------------|------------|--------------|
| <b>Mean =</b>   | 0.552            | 0.552      | 0.298        |
| <b>Median =</b> | 0.549            | 0.549      | 0.299        |
